# Supplementary material for: A Mouse Model with Ablated Asparaginase and Isoaspartyl Peptidase 1 (Asrgl1) Develops Early Onset Retinal Degeneration (RD) Recapitulating the Human Phenotype
Source: MDPI journal article supplement (doi:10.3390/genes13081461), 2022-08-17
Supplement: s1 [file s1]

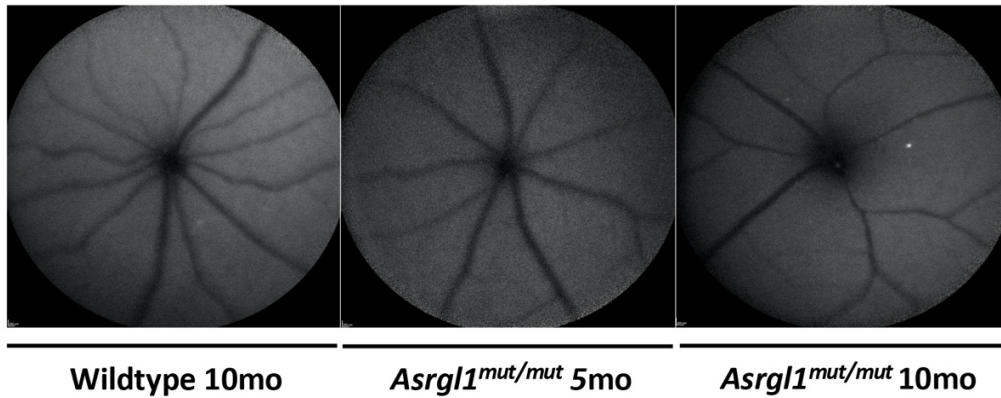

**Figure S1. Fundus Images of *Asrgl1*<sup>mut/mut</sup> mice model:** Representative fundus images obtained by autofluorescent scanning laser ophthalmoscopy (AF-SLO) imaging taken at 55° angle lens from both wildtype and *Asrgl1*<sup>mut/mut</sup> mice at 4 months and 12 months.

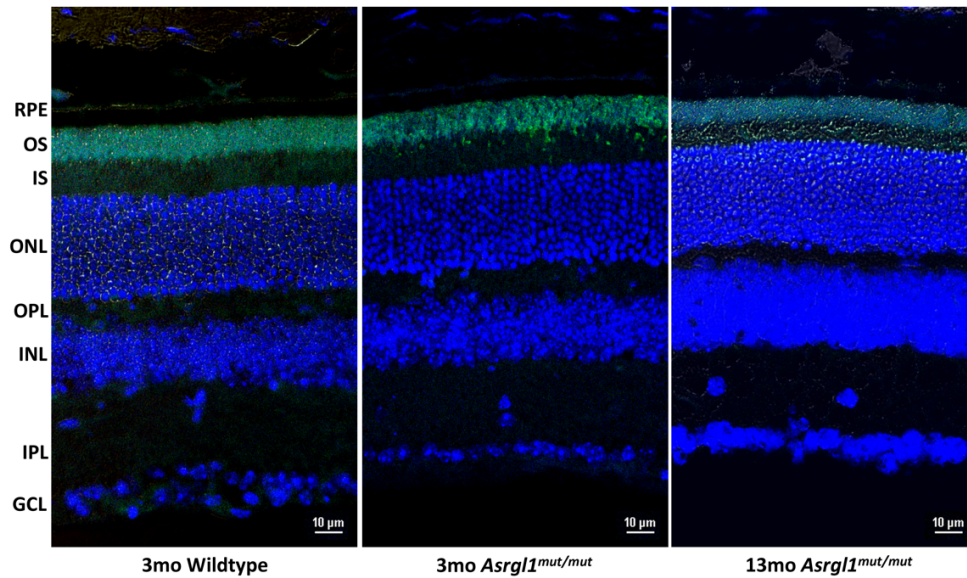

**Figure S2: Rhodopsin staining of *Asrgl1*<sup>mut/mut</sup> mice model:** The thickness of OS length appears to be reduced in retinal sections of 3 and 13 month old *Asrgl1*<sup>mut/mut</sup> mice immunostained with Rho (stained in green) show apparent. RPE: Retinal pigment epithelium; OS: Outer Segments; ONL: Outer Nuclear Layer; OPL: Outer Plexiform Layer; INL: Inner nuclear layer; IPL: Inner Plexiform Layer; GCL: Ganglion Cell Layer.
